# **Strengthening Bolivian Pharmacovigilance system: new therapeutic strategies to improve health of Chagas Disease and Tuberculosis patients**

**RUNNING TITLE:** Strengthening Bolivian Pharmacovigilance system

NURIA CORTES-SERRA<sup>1</sup>, RUTH SARAIVIA<sup>2</sup>, ROSSE MARY GRÁGEDA<sup>3</sup>, AMÍLCAR APAZA<sup>4</sup>, JORGE ARMANDO GONZÁLEZ<sup>5</sup>, BRENDA RÍOS<sup>6</sup>, JOAQUIM GASCON<sup>1</sup>, FAUSTINO TORRICO<sup>2</sup> and MARIA-JESUS PINAZO<sup>1</sup>

<sup>1</sup>ISGlobal, Hospital Clínic - Universitat de Barcelona, Barcelona, Spain

<sup>2</sup>Fundación CEADES, Cochabamba, Bolivia.

<sup>3</sup>Programa Departamental de Chagas, Cochabamba, Bolivia.

<sup>4</sup>Programa Departamental de Tuberculosis, Cochabamba, Bolivia.

<sup>5</sup>Unidad de Medicamentos y Tecnología en Salud (UNIMED), Área de Farmacovigilancia, Bolivia.

<sup>6</sup>Unidad de Medicamentos y Tecnología en Salud (UNIMED), Área de Vigilancia y Control, Bolivia.

Correspondence to: **Nuria Cortes-Serra**. Instituto de Salud Global de Barcelona (ISGlobal), Hospital Clínic i Provincial/ IDIBAPS, Universitat de Barcelona.

[nuria.cortes@isglobal.org](mailto:nuria.cortes@isglobal.org)

## 1 **ABSTRACT**

2 Introduction: Chagas disease (CD) and Tuberculosis (TB) are important health problems in  
3 Bolivia. Current treatments for both infections require a long period of time, and unwanted  
4 drug-related adverse events (ADRs) are frequent.

5 Purpose: This study aims to strengthen the Bolivian Pharmacovigilance system, focusing on CD  
6 and TB.

7 Methods: A situational diagnosis of Pharmacovigilance in the Department of Cochabamba was  
8 performed. The use of a new Local Case Report Form (CRF) was implemented, together with  
9 the CRF established by the Unidad de Medicamentos y Tecnología en Salud (UNIMED), in  
10 several health care centers. Training and follow-up on drug safety monitoring and ADR  
11 reporting was provided to all health professionals involved in CD and TB treatment. A  
12 comparative analysis of the reported ADRs using the CRF provided by UNIMED, the new CRF  
13 proposal, and medical records, was performed.

14 Results: Out of the total patients starting treatment for CD, 35,35% suffered ADR according to  
15 the information collected in the medical records, and 25% of them were classified as  
16 moderate/severe (MS) types. Only 51,43% of MS ADRs were reported to UNIMED. Regarding  
17 TB treatment, 9,89% of the total patients suffered ADR, 44% of them were classified as MS,  
18 and 75% of MS ADRs were reported to UNIMED.

19 Conclusions: The reinforcement of the Bolivian Pharmacovigilance system is an ambitious  
20 project that should take a long-term perspective and the engagement of national health  
21 workers and other stake holders at all levels. Continuity and perseverance are essential to

22 achieve a solid ADR reporting system, improving patient safety, drug efficacy and adherence to  
23 treatment.

## 24 **1. INTRODUCTION**

25 Chagas disease (CD), caused by the parasite *Trypanosoma cruzi* (*T. cruzi*), is one of the main  
26 health problems in Latin America. *T. cruzi* infection has been declared as a major public health  
27 issue in the region, affecting approximately 6 to 7 million people worldwide. Bolivia is the  
28 country with the highest prevalence and incidence of CD. In addition, travel and immigration  
29 patterns have increased the relevance of *T. cruzi* infection outside of endemic areas [1-3].

30

31 CD is recognized as one of the 17 neglected tropical diseases (NTDs), for which pharmaceutical  
32 industry does not assign resources to invest in research and development of new drugs.  
33 Approved drugs for treatment of *T. cruzi* infection (beznidazole and nifurtimox) are complex,  
34 and unwanted drug-related adverse events (ADRs) are frequent. The onset of the ADR is one of  
35 the main causes that lead to patient abandonment, resulting in therapeutic failure or  
36 ineffective treatment [4-9].

37

38 Tuberculosis (TB) is another important health problem in Bolivia, where the prevalence and  
39 incidence of the disease is high compared to other South American countries. TB treatment  
40 involves the combination of several drugs over a long period of time, with high frequency of  
41 ADRs, which compromise the effectiveness of treatment. In addition, resistance to current  
42 drugs has been increasing during the last years [10-12].

43

44 In the management of CD and TB, poor adherence to treatment continues to be another  
45 challenge to face. Factors contributing to poor medication adherence include lack of follow-up

46 protocols during treatment, and toxicity of the drugs. Nevertheless, with an adequate  
47 management of the drugs, most of patients are able to finish treatment even in case of ADRs,  
48 which in CD are usually mild and well controlled with symptomatic treatment. Close medical  
49 follow-up, monitoring ADRs and implementation of robust Pharmacovigilance systems are  
50 essential factors to avoid patient abandonment and achieve therapeutic success [13-17].

51

52 In the current context of CD and TB in Bolivia, strengthening the Bolivian Pharmacovigilance  
53 system is proposed as a key issue to reinforce therapeutic strategies. To implement a strong  
54 and consolidated Pharmacovigilance system including local health centers will allow to better  
55 detect and report ADRs in order to provide knowledge to improve patient safety and  
56 adherence of treatments.

57

## 58 **2. METHODOLOGY OF INTERVENTION**

### 59 **2.1 Actors involved**

60 The current project has been implemented by Barcelona Institute for Global Health (ISGlobal)  
61 and Fundación Ciencia y Estudios Aplicados para el Desarrollo en Salud y Medio Ambiente  
62 (CEADES). Both institutions shape the Bolivian Chagas Platform, a model to protocolize  
63 together with the Chagas National and Departmental Program the attention for adults with *T.*  
64 *cruzi* infection, and, by this way, to increase the number of adult patients diagnosed and  
65 treated for CD [17]. The research was done in collaboration with the Pharmacovigilance Unit  
66 (UNIMED) of the Bolivian Ministry of Health, the Pan American Health Organization (PAHO),  
67 the Departmental Chagas Program of Cochabamba (ChDP) and the Tuberculosis Departmental  
68 Program of Cochabamba (TBDP). A total of fourteen rural and urban primary and secondary  
69 health care centers participated in the study, including four health care centers of the Bolivian

70 Chagas Platform.

71

72

## 73 **2.2 Intervention plan**

74 The intervention plan was performed in several steps:

### 75 **A - Situational diagnosis**

76 A situational diagnosis of Pharmacovigilance in the Department of Cochabamba was  
77 performed in order to deeply study the causes of lack of reporting ADRs. The data collection  
78 method was the use of a survey which included questions related with knowledge and attitude  
79 towards Pharmacovigilance. All health professionals involved in CD treatment with at least one  
80 year of experience working in the national health system were selected to participate. The  
81 decision to include TB in the project was proposed by UNIMED after performing the situational  
82 diagnosis.

83

### 84 **B - Strategies to reinforce the current Bolivian Pharmacovigilance System**

85 Strengthening the Bolivian Pharmacovigilance system was proposed in our project as a key  
86 issue to reinforce therapeutic strategies in CD and TB. The Bolivian Pharmacovigilance system  
87 is based on fill out the CRF elaborated by UNIMED by health care professionals. Then, the form  
88 is sent to the healthcare network management, and finally it arrives to UNIMED. Together with  
89 local health entities and UNIMED, the implementation of a new Local Case Report Form (CRF)  
90 was suggested to the Bolivian Ministry of Health. The new form was elaborated based on the  
91 follow-up form used in the Bolivian Chagas Platforms, the CRF established in the national  
92 health system by UNIMED, and other CRFs used in other countries.

93

94 The CRF elaborated by UNIMED and the new CRF proposal were implemented in the Bolivian  
95 Chagas Platforms located in the Department of Cochabamba (one in urban area and three in  
96 rural areas), and in the primary and secondary national health care centers conforming the  
97 network. The CRF provided by UNIMED was already established in some of the health care  
98 facilities. Both forms were available in physical and electronic format, which was assigned  
99 randomly in each health care center. To evaluate the intervention, a comparative analysis of  
100 the use of the CRF established by UNIMED, the new CRF proposal, and the medical records to  
101 report ADRs was performed. The medical records of the total patients starting treatment for  
102 CD or TB were analyzed in order to detect how many of them suffered ADR during the  
103 treatment.

104

105 A specific training on drug safety monitoring and ADR reporting was given, together with PAHO  
106 and UNIMED, to all health professionals involved in CD and TB treatment. Three follow-up  
107 visits were performed in each health care center.

108

### 109 **C - Analysis of the ADRs reported**

110 An analysis of the ADRs reported was performed, focusing on the following variables: total  
111 patients reporting ADR; total patients abandoning treatment; affected organ-system; severity  
112 of ADRs reported; recurrent ADRs; health care intervention; differences in reporting rates  
113 between the CRF established by UNIMED, the new CRF proposal and the ADRS reported in the  
114 medical records; differences in reporting rates between physical and electronic CRF format;  
115 and differences in reporting rates between health care centers.

116

117 Patient abandonment was defined as the failure to complete medically indicated curative  
118 therapy.

119

## 120 **D - Data analysis**

121 Absolute and relative frequency counts, and measures of central tendency (mean) were  
122 calculated. GraphPad PRISM 5.0 software was used to draw graphs.

123

## 124 **E - Ethics statement**

125 The study protocol was approved by the Ethics Committee of the Hospital Clinic of Barcelona  
126 and the Ethics Committee of CEADES.

# 127 **3. RESULTS**

## 128 **3.1 Situational diagnosis: a challenging beginning**

129 Health care professionals confirmed the importance of reporting ADRs, giving an average score  
130 of 9,6 out of 10. This figure contrasts with the effectively reported ADR rate: 4,74 out of 10.

131

132 Causes for underreporting ADRs by health professionals were multifaceted. The most common  
133 reason for not reporting ADRs was "lack of knowledge and awareness about  
134 Pharmacovigilance and the duty of reporting" (50%). Health professionals also reported "lack  
135 of availability of report forms" (18,75%), "forgetfulness to fill out the form" (12,5%), "forms  
136 with too many variables" (6,25%), "patients forgetting to mention the ADR" (6,25%) and "ADRs  
137 with no clinical significance" (6,25%). Results are summarized in Fig 1.

138

### 139 **Figure 1: Causes for underreporting of ADRs.**

140

141 From all the health care professionals participating in the survey, 53% reported ADRs using

142 patient's medical record, 27% using CRFs established by UNIMED, and 20% using CRFs  
143 obtained from Bolivian ChDP. Regarding the CRF established by UNIMED, 62,5 % of health care  
144 professionals were not aware of it. Of the 37,5% that were aware about the CRF from  
145 UNIMED, only 33,3% of them were able to fill out the form correctly.

146

147 In terms of health care workers opinion, the most appropriate method to report ADRs was the  
148 use of electronic CRFs (50%), the use of CRFs in physical format (31,25%) or irrelevant  
149 (18,75%).

150

151 Regarding the issue of which ADRs should be reported to UNIMED, 43,75% of the health care  
152 professionals participating in our study considered important to report all type of ADRs,  
153 31,25% to report moderate and severe ADRs, and 25% to report only severe ADRs.

154 Lack of feedback from UNIMED to health care professionals could be another cause for  
155 underreporting of ADRs. A huge percentage of health care professionals (81,25%) considered  
156 that receiving feedback from UNIMED would increase the reporting rate of ADRs.

157

### 158 **3.2 Evaluation of the intervention**

159 From the 396 patients starting treatment for CD, 140 (35,35% of them) suffered ADR according  
160 to the information collected in the medical records. Out of the total ADRs collected in the  
161 medical records, 25% of them were classified as moderate or severe types, and should have  
162 been reported to the Bolivian Pharmacovigilance system. Only 51,43% of them were reported  
163 to UNIMED.

164

165 Regarding TB treatment, 9,89% of the total patients suffered ADR. Out of the total ADRs  
166 collected in the medical records, 44% of them were classified as moderate or severe types, and



167 should have been reported to the Bolivian Pharmacovigilance system. From all the ADRs that  
168 should have been reported, 75% of them were reported to UNIMED.

169

170 Results are summarized in Fig 2.

171

172 **Figure 2: Summary of the intervention results.**

### 173 **3.3 Analysis of the ADRs reported**

174 From a total of 396 patients participating in the study and starting treatment for CD, 140

|                                     | Cercado network | Sacaba network | Punata network | Villatunari network | Total        |
|-------------------------------------|-----------------|----------------|----------------|---------------------|--------------|
| Total patients starting treatment   | 198             | 47             | 59             | 92                  | 396          |
| Total patients reporting ADR        | 89 (50%)        | 22 (46,81%)    | 10 (16,95%)    | 19 (20,65%)         | 140 (35,35%) |
| Total patients abandoning treatment | 24 (15,66%)     | 10 (21,28%)    | 5 (8,47%)      | 11 (11,96%)         | 50 (12,63%)  |

175 (35,35%) reported with ADRs. Patient abandonment was of 12,63%. Results are shown in table

176 1.

177

178 **Table 1: Total patients starting treatment, reporting ADRs, and abandoning treatment for CD**  
179 **in the Bolivian Chagas Platforms located in the Department of Cochabamba and the primary**  
180 **and secondary national health care centers included in the study.**

181

182 From 91 patients starting treatment for TB, 9 (9,89%) reported with ADRs, and the percentage

183 of patient abandonment was 2,20%. Results are shown in table 2.

184

185

186

187

188

189 **Table 2: Total patients starting treatment, reporting ADRs, and abandoning treatment for TB**  
190 **in the primary and secondary national health care centers included in the study.**

|                                     | Cercado network | Sacaba network | Punata network | Villatunari network | Total     |
|-------------------------------------|-----------------|----------------|----------------|---------------------|-----------|
| Total patients starting treatment   | 45              | 27             | 5              | 14                  | 91        |
| Total patients reporting ADR        | 7 (15,56%)      | 0 (0%)         | 1 (20%)        | 1 (7,14%)           | 9 (9,89%) |
| Total patients abandoning treatment | 2 (4,44%)       | 0 (0%)         | 0 (0%)         | 0 (0%)              | 2 (2,20%) |

191

192 Concerning CD, 35% of the total ADRs presented during treatment were dermatological, 29%  
193 affected the central nervous system, 20% were gastrointestinal, and 16% affected other organs  
194 or systems. Most of the ADRs presented during CD treatment were mild (74%), whereas 15%  
195 were classified as mild/moderate, 10% as moderate, and 1% as severe. When focusing on the  
196 health care intervention, nearly all ADRs were treated in the primary health care center (99%),  
197 and only 1% had to be referred. Finally, the majority of the ADRs were non-recurrent (72%),  
198 while 28% were recurrent ADRs.

199

200 Regarding the characteristics of the ADRs presented during TB treatment, 36,36% of the total  
201 ADRs presented were dermatological, 36,36% gastrointestinal, and 27,27% affected the central  
202 nervous system. In terms of severity, 56% of the ADRs presented were classified as mild, 33%  
203 were considered moderate, and 11% were severe. Regarding health care intervention, 56% of  
204 the ADRs presented were treated in the primary health care center, 33% were referred, and  
205 11% were not reported. Lastly, most of the ADRs presented were non-recurrent (78%), while  
206 22% of them were recurrent.

207

## 208 **4. DISCUSSION**

209 Pharmacovigilance programme is an important component of National Healthcare Systems  
210 (NHS). Data coming from Pharmacovigilance programme is essential to ensure safety and  
211 effectiveness of drugs and to provide information concerning regulatory actions [18]. The  
212 efforts of the Bolivian Ministry of Health to increase access to treatment for CD and TB require  
213 strengthening the Pharmacovigilance system.

214

215 Despite having developed tools to report ADRs, Bolivian Pharmacovigilance System was not  
216 well known for most health professionals up to now. Together with UNIMED, the ChDP and the  
217 TBDP, an extended lack of knowledge and awareness about Pharmacovigilance was detected,  
218 as well as the duty of reporting, and the lack of reporting ADR forms provided by UNIMED.  
219 Insufficient training for healthcare professionals was the most important and urgent weakness  
220 detected, especially concerning the primary national health care centers located in rural areas.  
221 Training and follow-up on drug safety monitoring and ADR reporting was performed to all  
222 health professionals involved in CD and TB treatment. A more specific training on  
223 Pharmacovigilance was provided to all health professionals working in the national health care  
224 centers of rural areas (departments of Villatunari and Punata).

225

226 Although our project has shown interesting results, it is important to highlight that to reinforce  
227 the Bolivian Pharmacovigilance System requires persistence and an active follow-up with  
228 actors directly implicated in the NHS. This study emphasizes the importance of an educational  
229 intervention to change attitude towards ADR reporting among healthcare professionals.  
230 However, since it was a particular intervention, its long-term effect could not be measured.

231 Out of the total moderate and severe ADRs presented during CD treatment, only half of them  
232 were reported to the Bolivian Pharmacovigilance system. Regarding TB, 25% of the moderate  
233 and severe ADRs presented were not reported to the Bolivian Pharmacovigilance system. It is  
234 important to notice that health care professionals are more used to report ADRs related to TB  
235 than to CD, even though CD has been declared as a health priority for the Ministry of Health  
236 [19]. TBDP had a pioneering role in promoting national ADR reporting system and providing  
237 training for health care professionals [20]. Due to the characteristics of the current therapeutic  
238 schemes and the scaling-up of Chagas treatment, ChDP should put more emphasis on  
239 Pharmacovigilance activities to help physicians in their clinical practice.

240

241 The percentage of patient abandonment was 12,63% in CD patients, and 2,20% in TB patients.  
242 It is highlighted that although abandonment levels may seem not to be high in TB, TB  
243 treatment abandonment has fatal consequences for patients, which also become potential  
244 sources of infection and resistance to available drugs [21].

245

246 Differences in reporting rates between the CRF established by UNIMED and the new CRF  
247 proposal were not found. However, the new proposal of CRF results in better quality of data  
248 collected. Information about the characteristics of presented ADRs in terms of severity,  
249 affected organ-system, clinical suspicion of recurrence, and health care intervention is

250 collected in the CRF proposal. Better designed, user-friendly and standardized reporting forms  
251 would improve the process of capturing accurate information about ADR events [18]. New  
252 tools adapted to the reality of health care workers are needed in order to strengthen the  
253 current Bolivian ADR reporting system.

254

255

256 Lack of internet access is still an important problem in some regions of Bolivia, especially in  
257 rural areas. In several rural and urban health care centers included in our study internet  
258 connectivity was limited, and it was not possible to implement the CRF in electronic format.  
259 Nevertheless, other possibilities could be explored in order to overcome this limitation. Apps  
260 or electronic devices working in and offline mode could be an alternative [22]. Besides, some  
261 of the health care facilities participating in the study are currently under renovation, and it was  
262 considered important to have both forms (the CRF established by UNIMED and the new CRF  
263 proposal) available in electronic format in order to facilitate reporting.

264

265 Lack of knowledge by health care professionals regarding the classification of ADRs by severity  
266 was detected during the study. In several medical records, it was found the category «mild /  
267 moderate», which is not correct. Lack of consensus on definition of ADR was also detected,  
268 which is important also for the clinical management of the ADRs. In several medical records,  
269 symptoms experimented by patients probably associated with concomitants pathologies  
270 presented during CD or TB treatment were considered as ADRs. During our study, it was  
271 considered as ADR every event classified as that in medical records. Nevertheless, there is a  
272 need of overcoming these limitations.

273

274 Even if strengthen Bolivian Pharmacovigilance System has proven to be a good strategy to

275 improve patient health and increase adherence to CD and TB treatment, currently the system  
276 still presents some weaknesses. According to all actors involved in our project, the  
277 implementation of the next policies was suggested:

278

279 - To strengthen Pharmacovigilance activities in UNIMED, with external funding sources if it is  
280 required, at least in a preliminary phase.

281 - To provide continued training in Pharmacovigilance for health care professionals, validated by  
282 the Bolivian Ministry of Health and the Pan American Health Organization.

283

284 - To perform a continuous surveillance in Pharmacovigilance activities in health care centers  
285 through monitoring and evaluation programs provided by UNIMED. In a preliminary stage, this  
286 could require external technical support or funding sources.

287

288 - To integrate the topic Pharmacovigilance into the curricula in medical, pharmacy and nursing  
289 schools, to provide excellent training to future health care professionals.

290

## 291 **5. CONCLUSIONS**

292 Overall, our findings suggest that Bolivian Pharmacovigilance system still presents some  
293 challenges that should be addressed in the next years in order to achieve a strong, integrated  
294 and consolidated ADR reporting system. The reinforcement of the Bolivian Pharmacovigilance  
295 system is an ambitious project that should take a long-term perspective and several steps.  
296 Continuity and perseverance are essential to achieve a solid and integrated reporting of ADR  
297 system. UNIMED's current approach is to strengthen Bolivian Pharmacovigilance System in all  
298 care levels, focusing on other neglected and prevalent pathologies in Bolivia and including all  
299 the departments of the country. Several of our proposals are already in the process of being

300 implemented. However, the responsibility of leading these actions is still unclear. Further  
301 projects are needed in order to achieve a strong and consolidated ADR reporting system to  
302 improve patient safety, drug efficacy and adherence to treatment. A medium and long-term  
303 follow up to evaluate their impact is also required.

304

305

## 306 **6. ACKNOWLEDGEMENTS**

307 We thank Leire Pajín for her support, critical review and perspective, and all bolivian health  
308 personnel implied in the project.

309

## 310 **7. REFERENCES**

311 1. World Health Organization. **Chagas diseases in Latin America: an epidemiological update**  
312 **based on 2010 estimates**, 2015. Available in  
313 [<http://www.who.int/mediacentre/factsheets/fs340/en/>].

314 2. Bern, C., Kjos, S., Yabsley, M. J., Montgomery, S. P. **Trypanosoma cruzi and Chagas Disease**  
315 **in the United States**. *Clinical microbiology reviews* 24, 655-681, doi:10.1128/CMR.00005-11  
316 (2011).

317 3. Gascon, J., Bern, C., Pinazo, M. J. **Chagas disease in Spain, the United States and other non-**  
318 **endemic countries**. *Acta tropica* 115, 22-27, doi:10.1016/j.actatropica.2009.07.019 (2010).

319 4. Jackson Y, Alirol E, Getaz L, Wolff H, Combescure C, Chappuis F. **Tolerance and safety of**  
320 **nifurtimox in patients with chronic chagas disease**. *Clin Infect Dis*, 69-75, doi: 10.1086/656917  
321 (2010).

322 5. Pinazo MJ, Muñoz J, Posada E, López-Chejade P, Gállego M, Ayala E, *et al*. **Tolerance of**  
323 **benznidazole in treatment of Chagas' disease in adults**. *Antimicrob Agents Chemother* 54(11):

- 324 4896-9 (2010).
- 325 6. Viotti R, Vigliano C, Lococo B, Alvarez MG, Petti M, Bertocchi G, *et al.* **Side effects of**  
326 **benznidazole as treatment in chronic Chagas disease: fears and realities.** *Expert Rev Anti*  
327 *Infect Ther.* 7(2):157-63. doi: 10.1586/14787210.7.2.157 (2009).
- 328 7. Urbina JA. **Specific chemotherapy of Chagas disease: relevance, current limitations and**  
329 **new approaches.** *Acta Trop*, 55-68,115(1-2): doi: 10.1016/j.actatropica (2009).
- 330 8. Alarcón de Noya B, Ruiz-Guevara R, Noya O, Castro J, Ossenkopp J, Díaz-Bello Z, *et al.* **Long-**  
331 **term comparative Pharmacovigilance of orally transmitted Chagas disease: first report.**  
332 *Expert Rev Anti Infect Ther*, 15(3):319-325. doi: 10.1080/14787210.2017.1286979 (2017).
- 333 9. Aldasoro E, Posada E, Requena-Méndez A, Calvo-Cano A, Serret N, Casellas A, *et al.* **What to**  
334 **expect and when: benznidazole toxicity in chronic Chagas' disease treatment.** *Journal of*  
335 *Antimicrobial Chemotherapy*, dkx516, <https://doi.org/10.1093/jac/dkx516> (2018).
- 336 10. Pan American Health Organization. **Tuberculosis in the Americas. Regional Report 2014,**  
337 2014.
- 338 11. Tiberi, S., Munoz-Torricoc, Duarte, R., Dalcolmo, M., D'Ambrosio, L., Zumla, A., *et al.* **New**  
339 **drugs and perspectives for new anti-tuberculosis regimens.** *Revista Portuguesa de*  
340 *Pneumologia*. <https://doi.org/10.1016/j.rppnen.2017.10.009> (2018).
- 341 12. Dobbs TE, Webb RM. **Chemotherapy of Tuberculosis.** *Microbiol Spectr*, 5(2). doi:  
342 10.1128/microbiolspec.TNMI7-0040-2017 (2017).
- 343 13. Garner P, Smith H, Munro S, Volmink J. **Promoting adherence to tuberculosis treatment.**  
344 *Bull World Health Organ* 85: 404-6 (2007).
- 345 14. Awofeso N. **Anti-tuberculosis medication side-effects constitute major factor for poor**  
346 **adherence to tuberculosis treatment.** *Bull World Health Organ* 86:161-240 (2008).
- 347 15. Sartor P, Colaianni I, Cardinal MV, Bua J, Freilij H, Gürtler RE. **Improving access to Chagas**  
348 **disease diagnosis and etiologic treatment in remote rural communities of the Argentine**



- 349 **Chaco through strengthened primary health care and broad social participation.** *PloS Negl*  
350 *Trop Dis* 11(2) (2017).
- 351 16. Pinazo MJ, Guerrero L, Posada E, Rodríguez E, Soy D, Gascon J. **Benznidazole-related**  
352 **adverse drug reactions and their relationship to serum drug concentrations in patients with**  
353 **chronic chagas disease.** *Antimicrob Agents Chemother.*, 390-5, doi: 10.1128/AAC.01401-12  
354 (2012).
- 355 17. Pinazo MJ, Pinto J, Ortiz L, Sánchez J, García W, Saravia R, *et al.* **A strategy for scaling up**  
356 **access to comprehensive care in adults with Chagas disease in endemic countries: The**  
357 **Bolivian Chagas Platform.** *PLoS Negl Trop Dis.*, 11(8):1–12 (2017).
- 358 18. Maigetter K, Pollock A, Kadam A, Ward K, Weiss M. **Pharmacovigilance in India, Uganda**  
359 **and South Africa with reference to WHO’s minimum requirements.** *Int J Health Policy Manag,*  
360 4(5), 295–305, doi:10.15171/ijhpm.2015.55 (2015).
- 361 19. **Law nº 3374.** Gaceta Oficial del Estado Plurinacional de Bolivia, la Paz, Bolivia, 23 de marzo  
362 de 2006.
- 363 20. López A, Hernández PE. **Reacciones adversas a fármacos antituberculosos en hospitales**  
364 **de III nivel, Caja Nacional de Salud - Hospital Viedma abril 2002 a abril 2005.** *Rev. méd.*  
365 *(Cochabamba)*, vol.18, n.28, 32-41 (2007).
- 366 21. Santos R, Mendes K, Andrade A, Fredemir P, de Almeida J, Duarte L. **Tuberculosis**  
367 **treatment abandonment and comprehensive health care to patients in the family healthcare**  
368 **strategy.** *Text Context Nursing*, 21(3): 650-7 (2012).
- 369 22. Technology, P. (2008). **What is PViMS ? Pharmacovigilance Monitoring System**, 1(703), 1-  
370 2.

## Causes for underreporting of ADRs

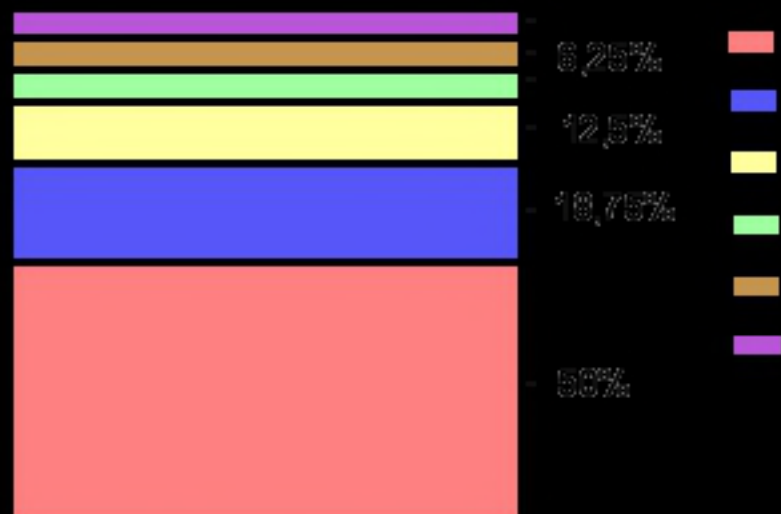

Figure 1: Causes for underreporting of ADRs

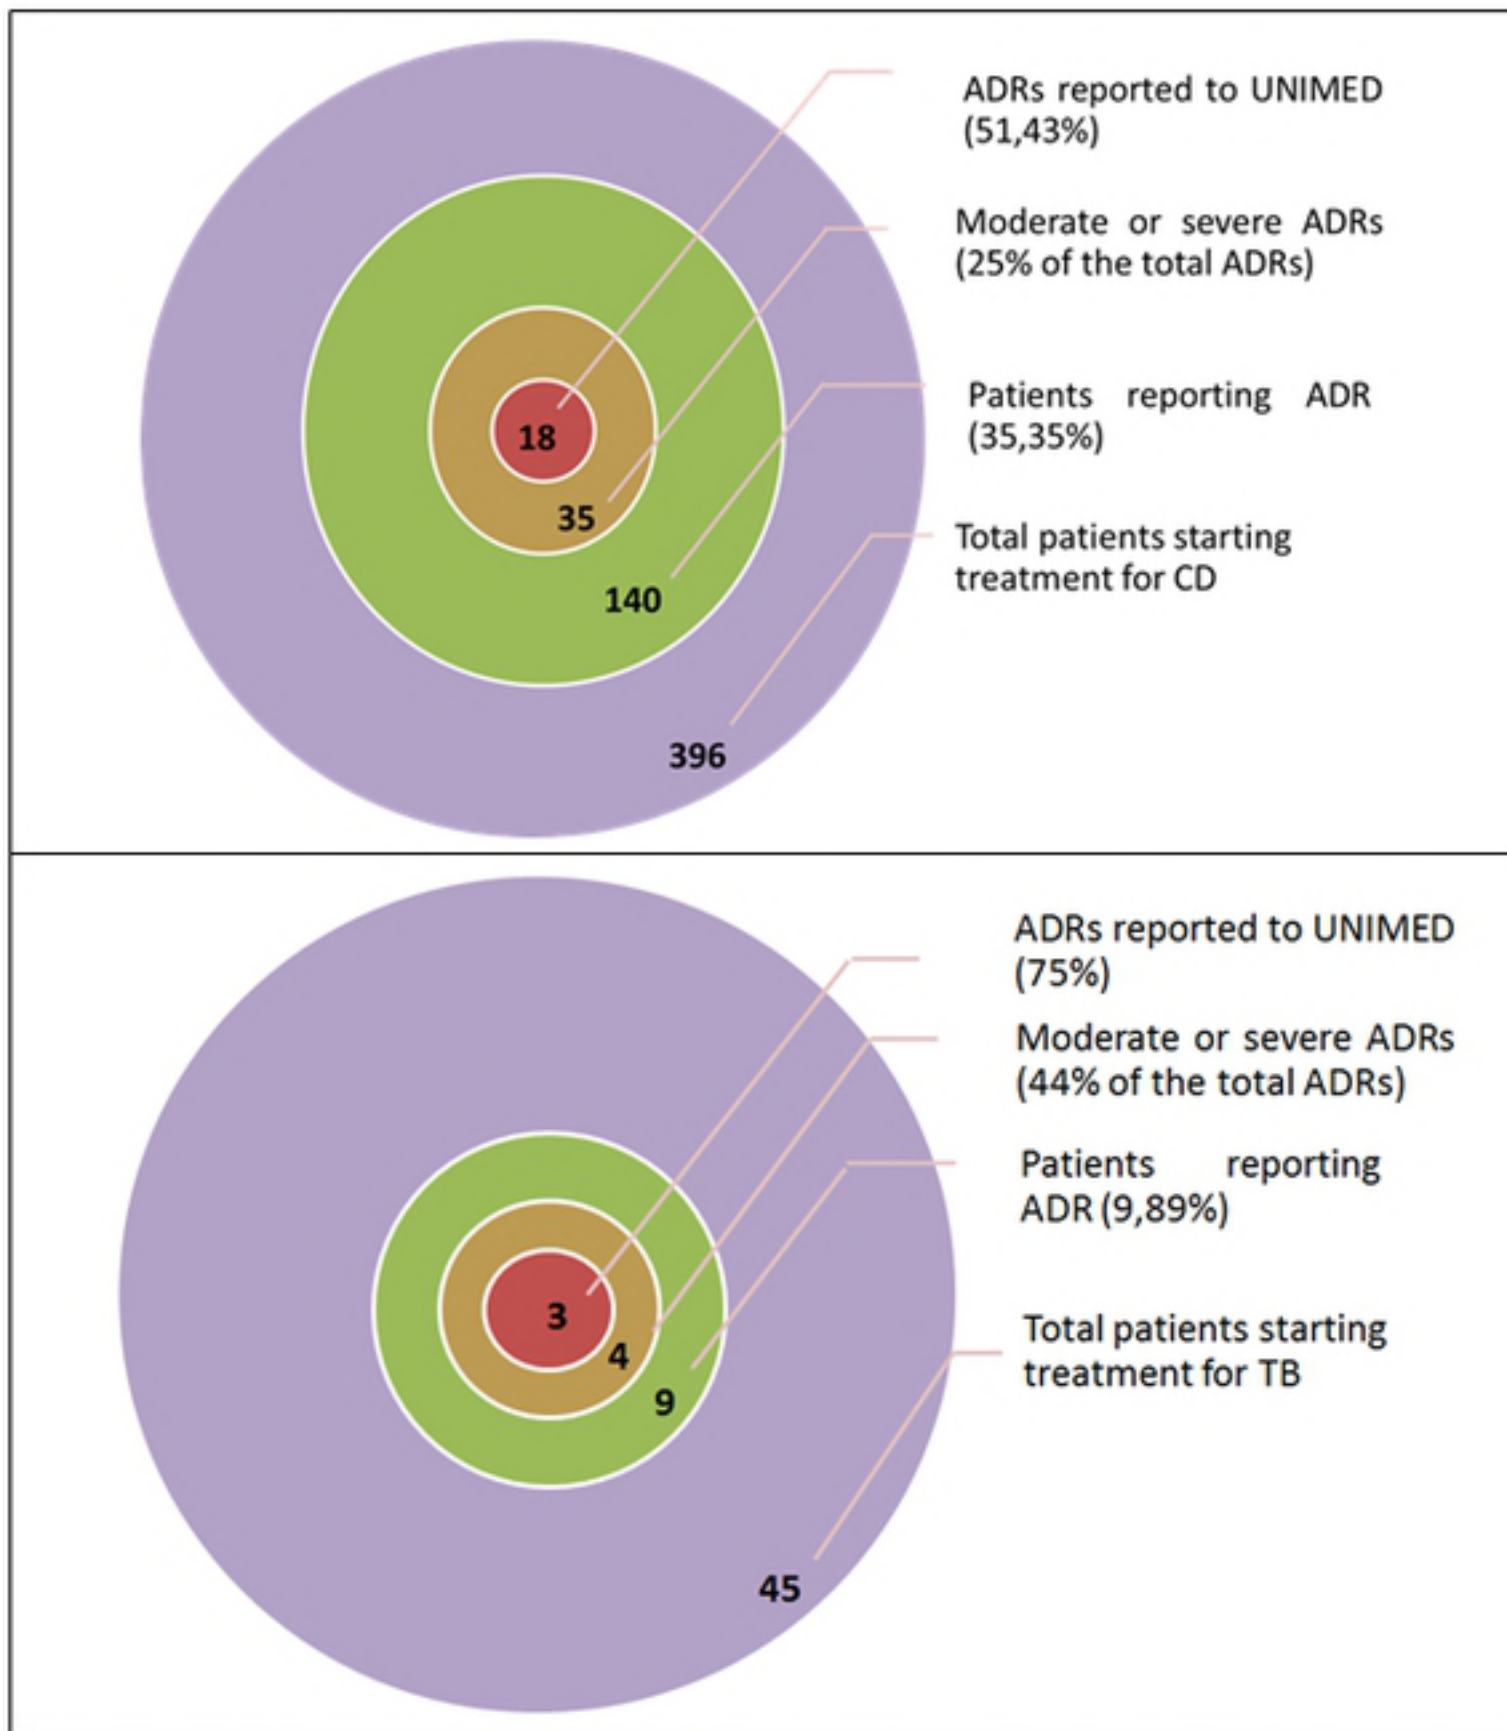

Figure 2: Summary of the intervention results
